# Supplementary material for: Sustainability and efficiency assessment of vanillin allylation: in solution versus ball-milling
Source: Royal Society of Chemistry journal article supplement (doi:10.1039/d2gc02185d), 2022-01-01
Supplement: d2gc02185d1.pdf [file d2gc02185d1.pdf]

## **Sustainability and efficiency assessment of vanillin allylation: in solution versus ball-milling**

Damien Breilly,<sup>a</sup> Sami Fadlallah,<sup>a</sup> Vincent Froidevaux,<sup>b</sup> Frédéric Lamaty,<sup>c</sup> Florent Allais\*<sup>a</sup> Thomas-Xavier Métro\*<sup>d</sup>

<sup>a</sup> URD Agro-Biotechnologies Industrielles (ABI), CEBB, AgroParisTech, 51110 Pomacle

<sup>b</sup> CHRYSO Saint-Gobain, 45300 Sermaises

<sup>c</sup> IBMM, Univ Montpellier, CNRS, ENSCM, Montpellier, France

<sup>d</sup> ICGM, Univ Montpellier, CNRS, ENSCM, Montpellier, France

Correspondence should be sent to: florent.allais@agroparistech.fr & thomas-xavier.metro@umontpellier.fr

### Table of content

Figure S1: FTIR spectra of 3-methoxy-4-(2-propen-1-yloxy)benzaldehyde, (allylated vanillin)

Figure S2: FTIR spectra of 3-[3-methoxy-4-(2-propen-1-yloxy)phenyl]-2-propenoic acid ethyl ester (allylated ethyl ferulate)

Figure S3: <sup>1</sup>H NMR spectra of 3-methoxy-4-(2-propen-1-yloxy)benzaldehyde (allylated vanillin)

Figure S4: <sup>1</sup>H NMR spectra of 3-[3-methoxy-4-(2-propen-1-yloxy)phenyl]-2-propenoic acid ethyl ester (allylated ethyl ferulate)

Figure S5: <sup>13</sup>C NMR spectra of 3-methoxy-4-(2-propen-1-yloxy)benzaldehyde (allylated vanillin)

Figure S6: <sup>13</sup>C NMR spectra of 3-[3-methoxy-4-(2-propen-1-yloxy)phenyl]-2-propenoic acid ethyl ester (allylated ethyl ferulate)

Figure S7: Photography of a planetary ball mill P7 with 20 mL reactors and a planetary ball mill Retsch PM100 with a 250 mL reactor

Figure S8: Chromatogram of 3-methoxy-4-(2-propen-1-yloxy)benzaldehyde (allylated vanillin) before (top) and after purification (bottom)

Figure S9: Chromatogram of 3-[3-methoxy-4-(2-propen-1-yloxy)phenyl]-2-propenoic acid ethyl ester (allylated ethyl ferulate) before and after purification

Equation S1: Environmental factor equation

Figure S10: Symbols utilized for the representation of experimental mechanochemical conditions

Table S1: Details for the calculations of the *E* factors

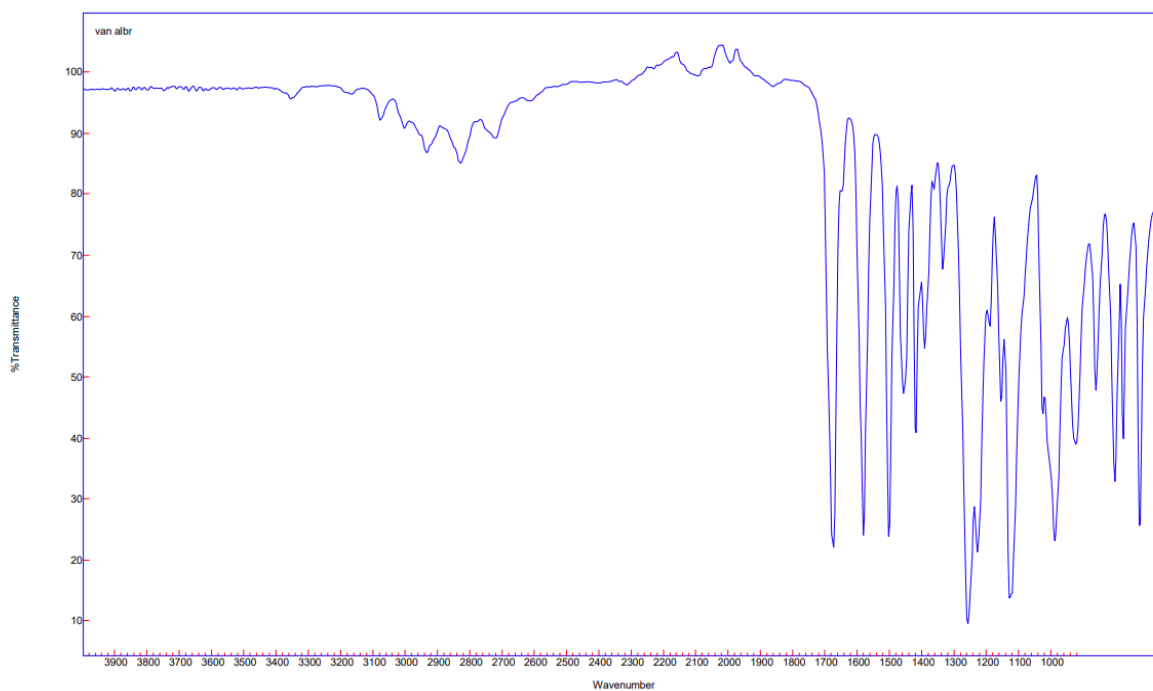

**Figure S1: FTIR spectra of 3-methoxy-4-(2-propen-1-yloxy)benzaldehyde (allylated vanillin)**

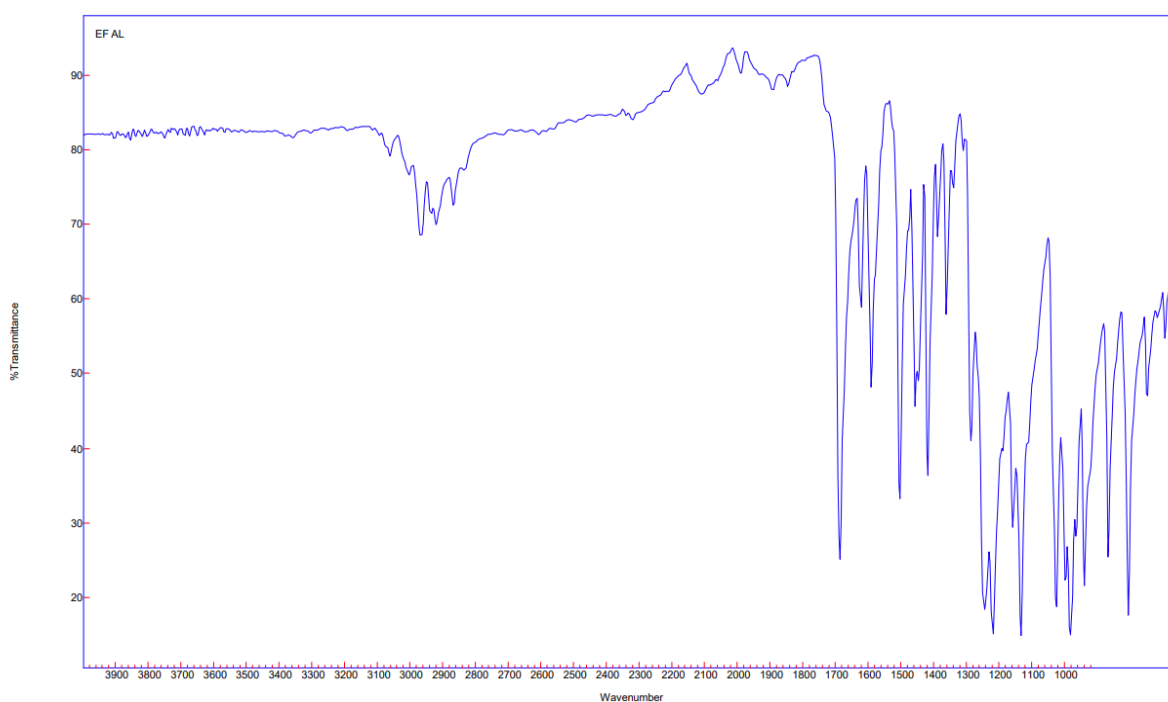

**Figure S2: FTIR spectra of 3-[3-methoxy-4-(2-propen-1-yloxy)phenyl]-2-propenoic acid ethyl ester (allylated ethyl ferulate)**

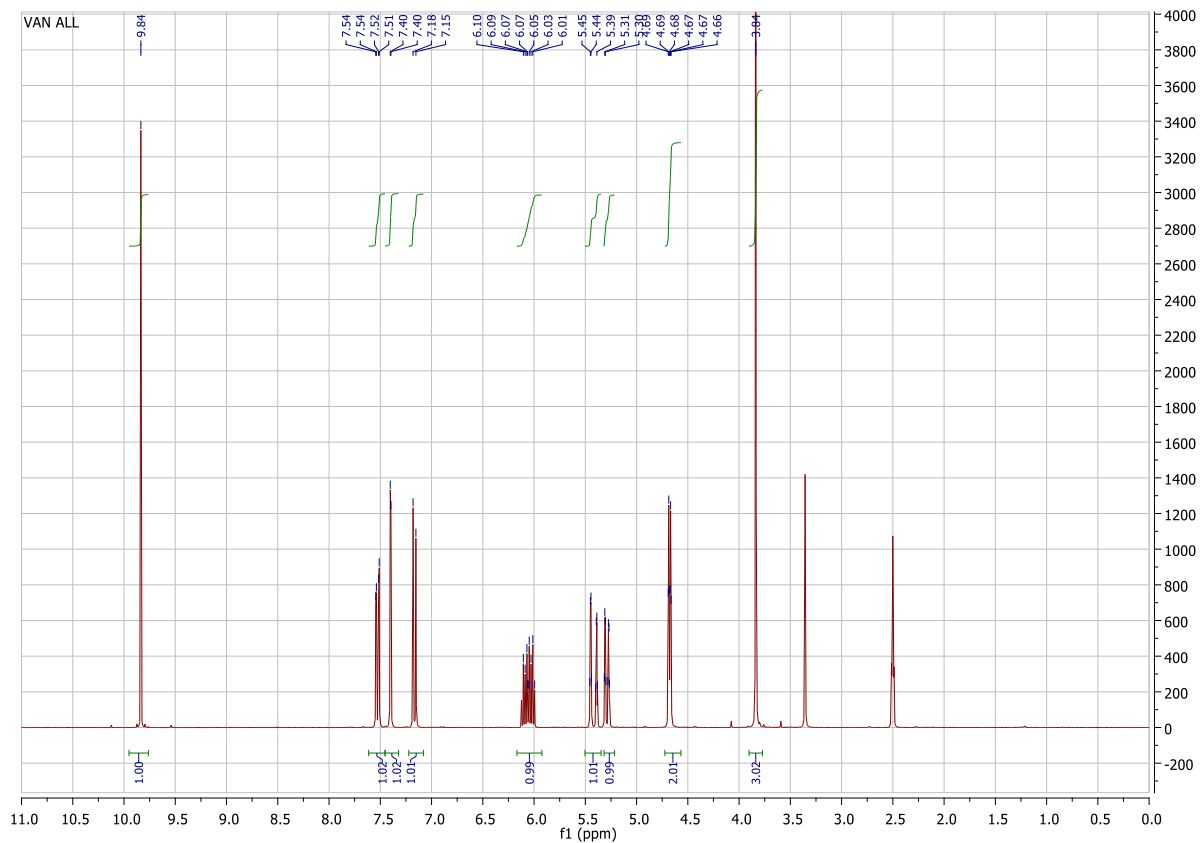

Figure S3:  $^1\text{H}$  NMR spectra of 3-methoxy-4-(2-propen-1-yloxy)benzaldehyde (allylated vanillin)

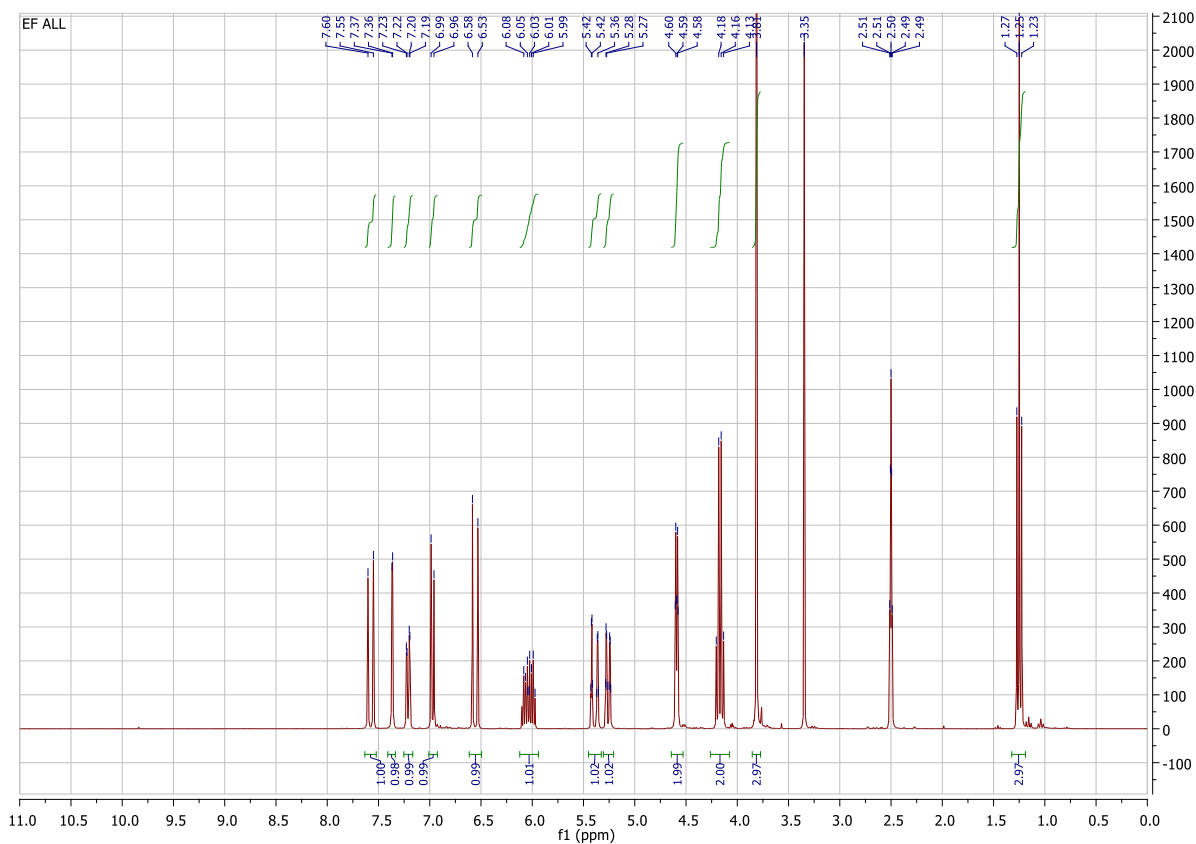

Figure S4:  $^1\text{H}$  NMR spectra of 3-[3-methoxy-4-(2-propen-1-yloxy)phenyl]-2-propenoic acid ethyl ester (allylated ethyl ferulate)

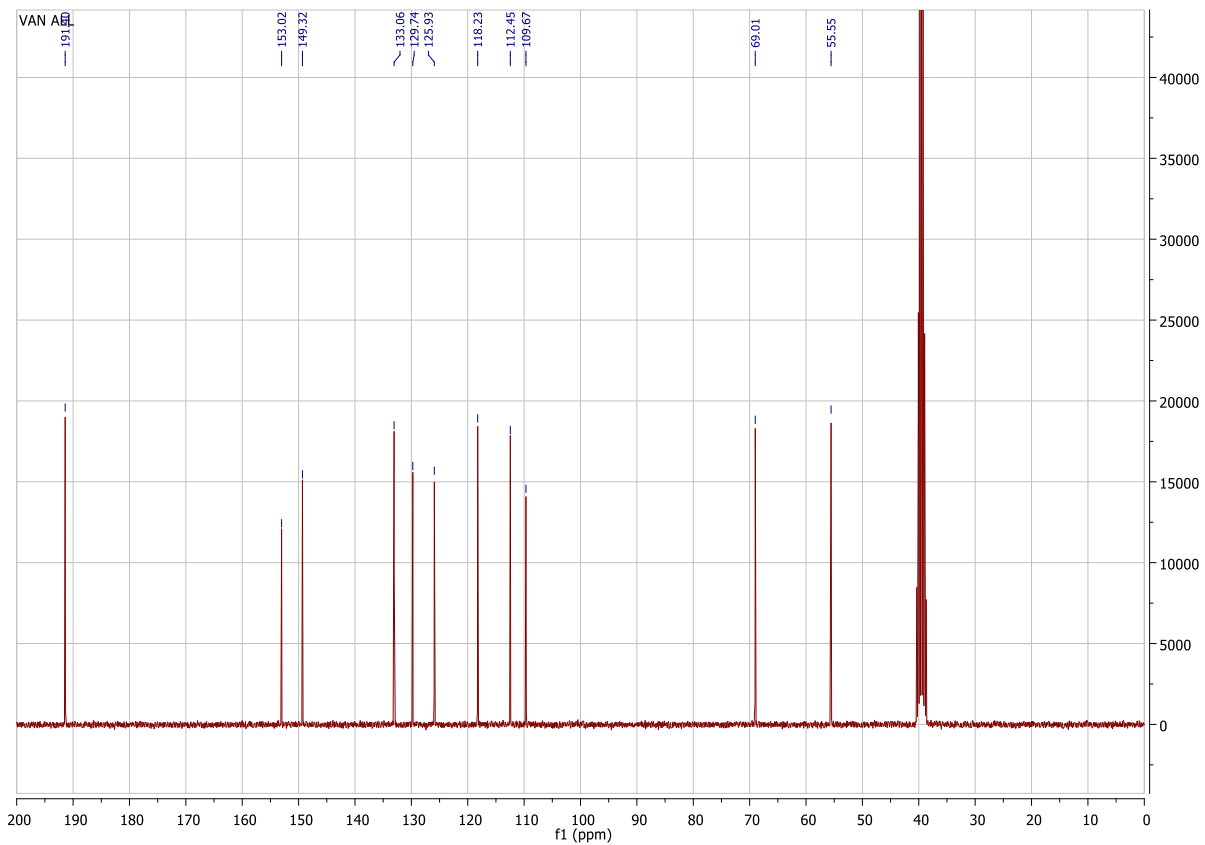

Figure S5:  $^{13}\text{C}$  NMR spectra of 3-methoxy-4-(2-propen-1-yloxy)benzaldehyde (allylated vanillin)

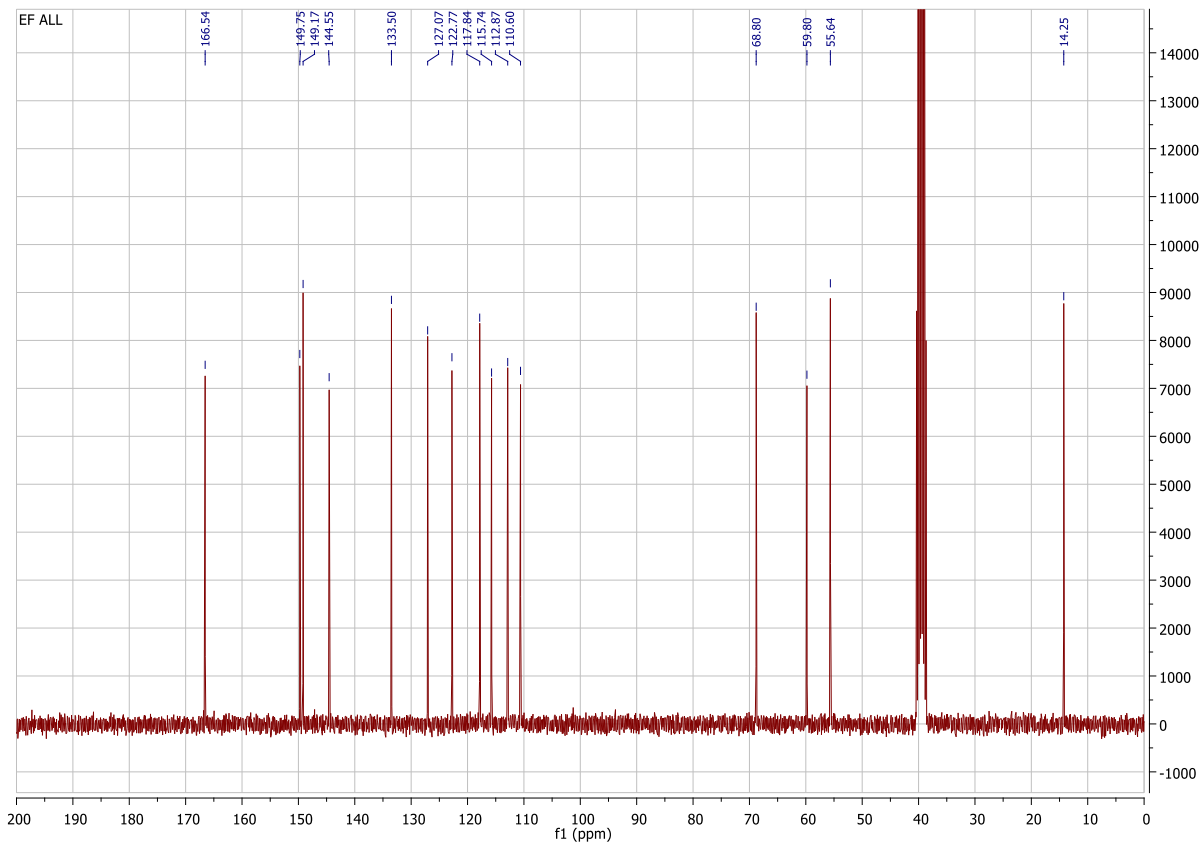

Figure S6:  $^{13}\text{C}$  NMR spectra of 3-[3-methoxy-4-(2-propen-1-yloxy)phenyl]-2-propenoic acid ethyl ester (allylated ethyl ferulate)

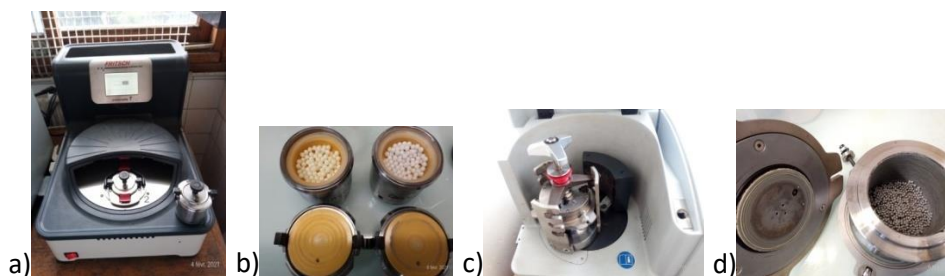

Figure S7: Photography of (a) a planetary ball mill P7 with (b) 20 mL reactors and (c) a planetary ball mill Retsch PM100 with (d) a 250 mL reactor

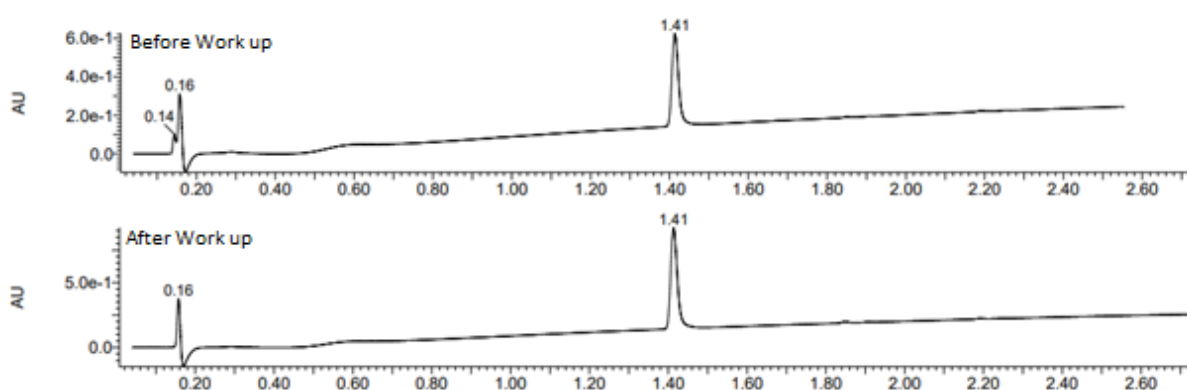

Figure S8: Chromatogram of 3-methoxy-4-(2-propen-1-yloxy)benzaldehyde (allylated vanillin) before (top) and after work up (bottom) (abscissa in AU and ordinate in minute)

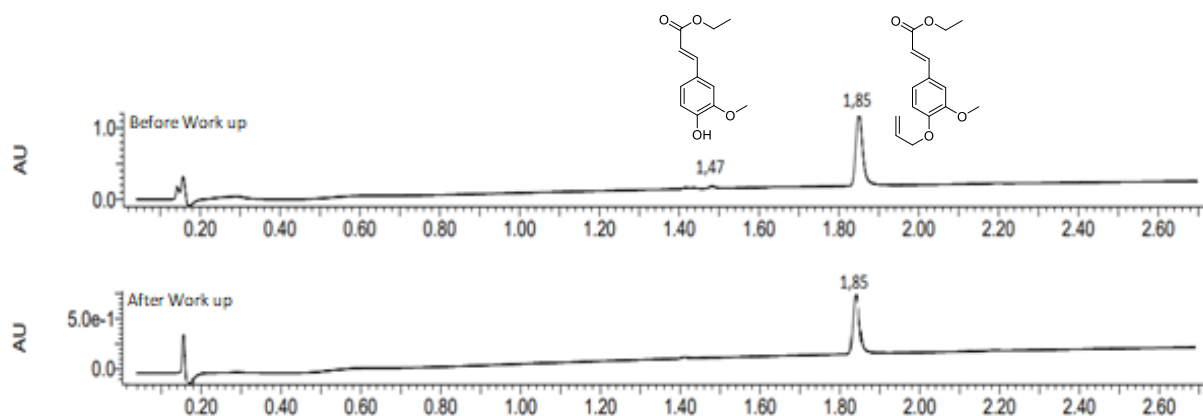

Figure S9: Chromatogram of 3-[3-methoxy-4-(2-propen-1-yloxy)phenyl]-2-propenoic acid ethyl ester (allylated ethyl ferulate) before (top) and after work up (bottom) (abscissa in AU and ordinate in minute)

$$E \text{ Factor} = \frac{\sum m(\text{solvent}) + \sum m(\text{water}) + \sum m(\text{reagent}) + \sum m(\text{raw material}) - m(\text{desired product})}{m(\text{desired product})}$$

Equation S1: Environmental factor equation

| Primary Mechanochemical Action                                                                         |                                                                                                        | Additives                                                                                            | Temperature Control                                                                                       | Atmosphere                                                                                              |
|--------------------------------------------------------------------------------------------------------|--------------------------------------------------------------------------------------------------------|------------------------------------------------------------------------------------------------------|-----------------------------------------------------------------------------------------------------------|---------------------------------------------------------------------------------------------------------|
|  Vibratory Ball Mill  |  Twin Screw Extrusion |  Neutral Liquid     |  Heating                 |  Ambient Atmosphere  |
|  Planetary Ball Mill  |  Sheering             |  Ionic Liquid       |  Cooling                |  Dry Air             |
|  Manual Grinding      |  Impact               |  Solid Additives    |  Self-Sustained Heating |  Nitrogen Atmosphere |
|  Mixing e.g. RAM    |  Ageing              |  Polymer Additives |                                                                                                           |  Humid Atmosphere   |
|  Tensile Stretching |                                                                                                        |                                                                                                      |                                                                                                           |                                                                                                         |

Figure S10: Symbols utilized for the representation of experimental mechanochemical conditions (according to Michalchuk *et al.*, *Front. Chem.* **2021**, *9*, 359)

| Author, year                    | phenol            | m(phenol)<br>(g) | Eq<br>K <sub>2</sub> CO <sub>3</sub> | m(K <sub>2</sub> CO <sub>3</sub> )<br>(g) | Eq(AllylBr) | m(AllylBr)<br>(g) | solvent      | V(solvent)<br>(mL) | m(solvent)<br>(g) | Eq<br>solvent | yield | m(product)<br>(g) | Simple <i>E</i><br>Factor <sup>a</sup> | Work-up<br>solvent 1<br>(g) | Work-up<br>solvent 2<br>(g) | Work-up<br>solvent 3<br>(g) | Complete<br><i>E</i> factor <sup>b</sup> |
|---------------------------------|-------------------|------------------|--------------------------------------|-------------------------------------------|-------------|-------------------|--------------|--------------------|-------------------|---------------|-------|-------------------|----------------------------------------|-----------------------------|-----------------------------|-----------------------------|------------------------------------------|
| Srikrishna et al,<br>2007       | vanillin          | 2.5              | 2.02                                 | 4.59                                      | 2.00        | 3.98              | acetone      | 5                  | 3.92              | 4.11          | 100%  | 3.25              | <b>3.61</b>                            | /                           | /                           | /                           | n.a. <sup>c</sup>                        |
| Hoffmann et al,<br>2014         | vanillin          | 15.2             | 1.00                                 | 13.8                                      | 1.10        | 13.3              | ethanol      | 50                 | 39.5              | 8.57          | 98%   | 18.84             | <b>3.34</b>                            | /                           | /                           | /                           | n.a. <sup>c</sup>                        |
| Ayer et al,<br>1992             | vanillin          | 12.2             | 0.99                                 | 11                                        | 1.05        | 10.21             | DMF          | 20                 | 18.88             | 3.22          | 98%   | 15.06             | <b>2.47</b>                            | /                           | /                           | /                           | n.a. <sup>c</sup>                        |
| Chate et al, 2012               | vanillin          | 1                | 1.09                                 | 0.99                                      | 1.00        | 0.798             | DMF          | 5                  | 4.72              | 9.83          | 92%   | 1.16              | <b>5.46</b>                            | /                           | /                           | /                           | n.a. <sup>c</sup>                        |
| Kevwitch et al,<br>2012         | vanillin          | 102              | 0.54                                 | 50.2                                      | 1.02        | 82.5              | DMF          | 600                | 566.4             | 11.56         | 96%   | 123               | <b>5.51</b>                            | 300                         | 265                         | 480.8                       | <b>14</b>                                |
| This work in<br>solution in DMF | vanillin          | 1                | 1                                    | 0.908                                     | 1.5         | 1.188             | DMF          | 2.6                | 2.45              | 5.11          | 86%   | 1.09              | <b>4.09</b>                            | 54.12                       | 20                          | 20.8                        | <b>91</b>                                |
| This work, pbm<br>mg-scale      | vanillin          | 0.129            | 1                                    | 0.117                                     | 1.5         | 0.154             | DMF<br>η=0.2 | 0.08               | 0.076             | 1.22          | 87%   | 0.143             | <b>2.33</b>                            | 22.6                        | 5                           | 10.4                        | <b>268</b>                               |
| This work, pbm<br>g-scale       | vanillin          | 1.61             | 1                                    | 1.46                                      | 1.5         | 1.93              | DMF<br>η=0.2 | 1.00               | 0.94              | 1.22          | 95%   | 1.94              | <b>2.06</b>                            | 135.3                       | 50                          | 52                          | <b>124</b>                               |
| This work, pbm<br>mg-scale      | ethyl<br>ferulate | 0.164            | 1                                    | 0.102                                     | 1.5         | 0.13              | DMF<br>η=0.2 | 0.08               | 0.076             | 1.40          | 82%   | 0.16              | <b>1.98</b>                            | 22.6                        | 5                           | 10.4                        | <b>239</b>                               |
| This work, pbm<br>g-scale       | ethyl<br>ferulate | 2.05             | 1                                    | 1.28                                      | 1.5         | 1.68              | DMF<br>η=0.2 | 1.00               | 0.94              | 1.40          | 92%   | 2.24              | <b>1.66</b>                            | 135.3                       | 50                          | 52                          | <b>108</b>                               |

<sup>a</sup> Work-up solvents were not taken into account in the calculation of the *E* factor. <sup>b</sup> Work-up solvents were taken into account in the calculation of the *E* factor. <sup>c</sup> n.a.: not applicable (information not available in the original publication, e.g. volume of solvent used for column chromatography purification).

**Table S1: Details for the calculations of the *E* factors**
